# Supplementary material
Source: PubMed Central journal article supplement (PMC4125399)
Supplement: 157df410830b64b176b5644f1136d555_genetics.114.166181-10.pdf [file 157df410830b64b176b5644f1136d555_genetics.114.166181-10.pdf]

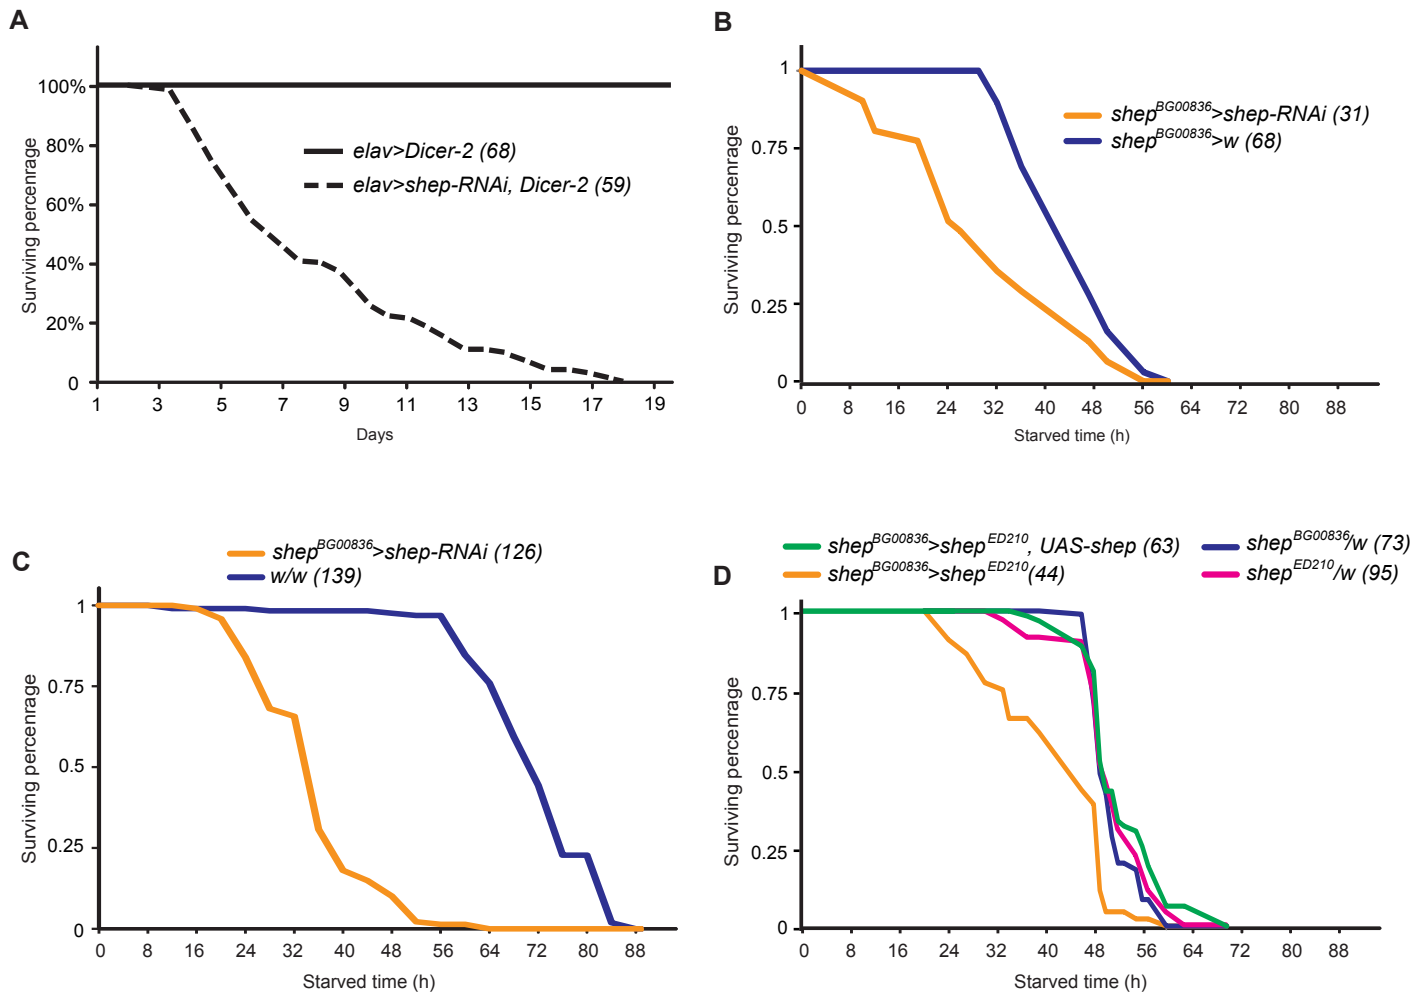

**Figure S8** Loss of *shep* resulted in reduced life span. (A) Pan-neuronal *shep* RNAi led to shorter life span. The running percentage of surviving adults was plotted for  $elav>shep-RNAi, Dicer-2$  and  $elav>Dicer-2$  adult flies on regular food. (B-D) Reduced starvation resistance was detected in multiple *shep* mutants. Cumulative survival under starvation conditions was calculated (see methods) for  $shep^{BG00836}>shep-RNAi$ ,  $shep^{BG00836}$  homozygotes,  $shep^{BG00836}/shep^{ED210}$  mutants, and  $shep^{BG00836}/shep^{ED210}, UAS-shep$  rescue flies. In each panel, the *shep* loss-of-function genotype is labeled in orange. The results for *shep* heterozygotes are shown in blue and magenta, and the results for flies rescued with *UAS-shep* are shown in green. Sample sizes are listed in parentheses following each genotype.
