# Supplementary material
Source: PubMed Central journal article supplement (PMC4125399)
Supplement: 3997b714a92d66cc3ed66e3e96bef3e2_genetics.114.166181-2.pdf [file 3997b714a92d66cc3ed66e3e96bef3e2_genetics.114.166181-2.pdf]

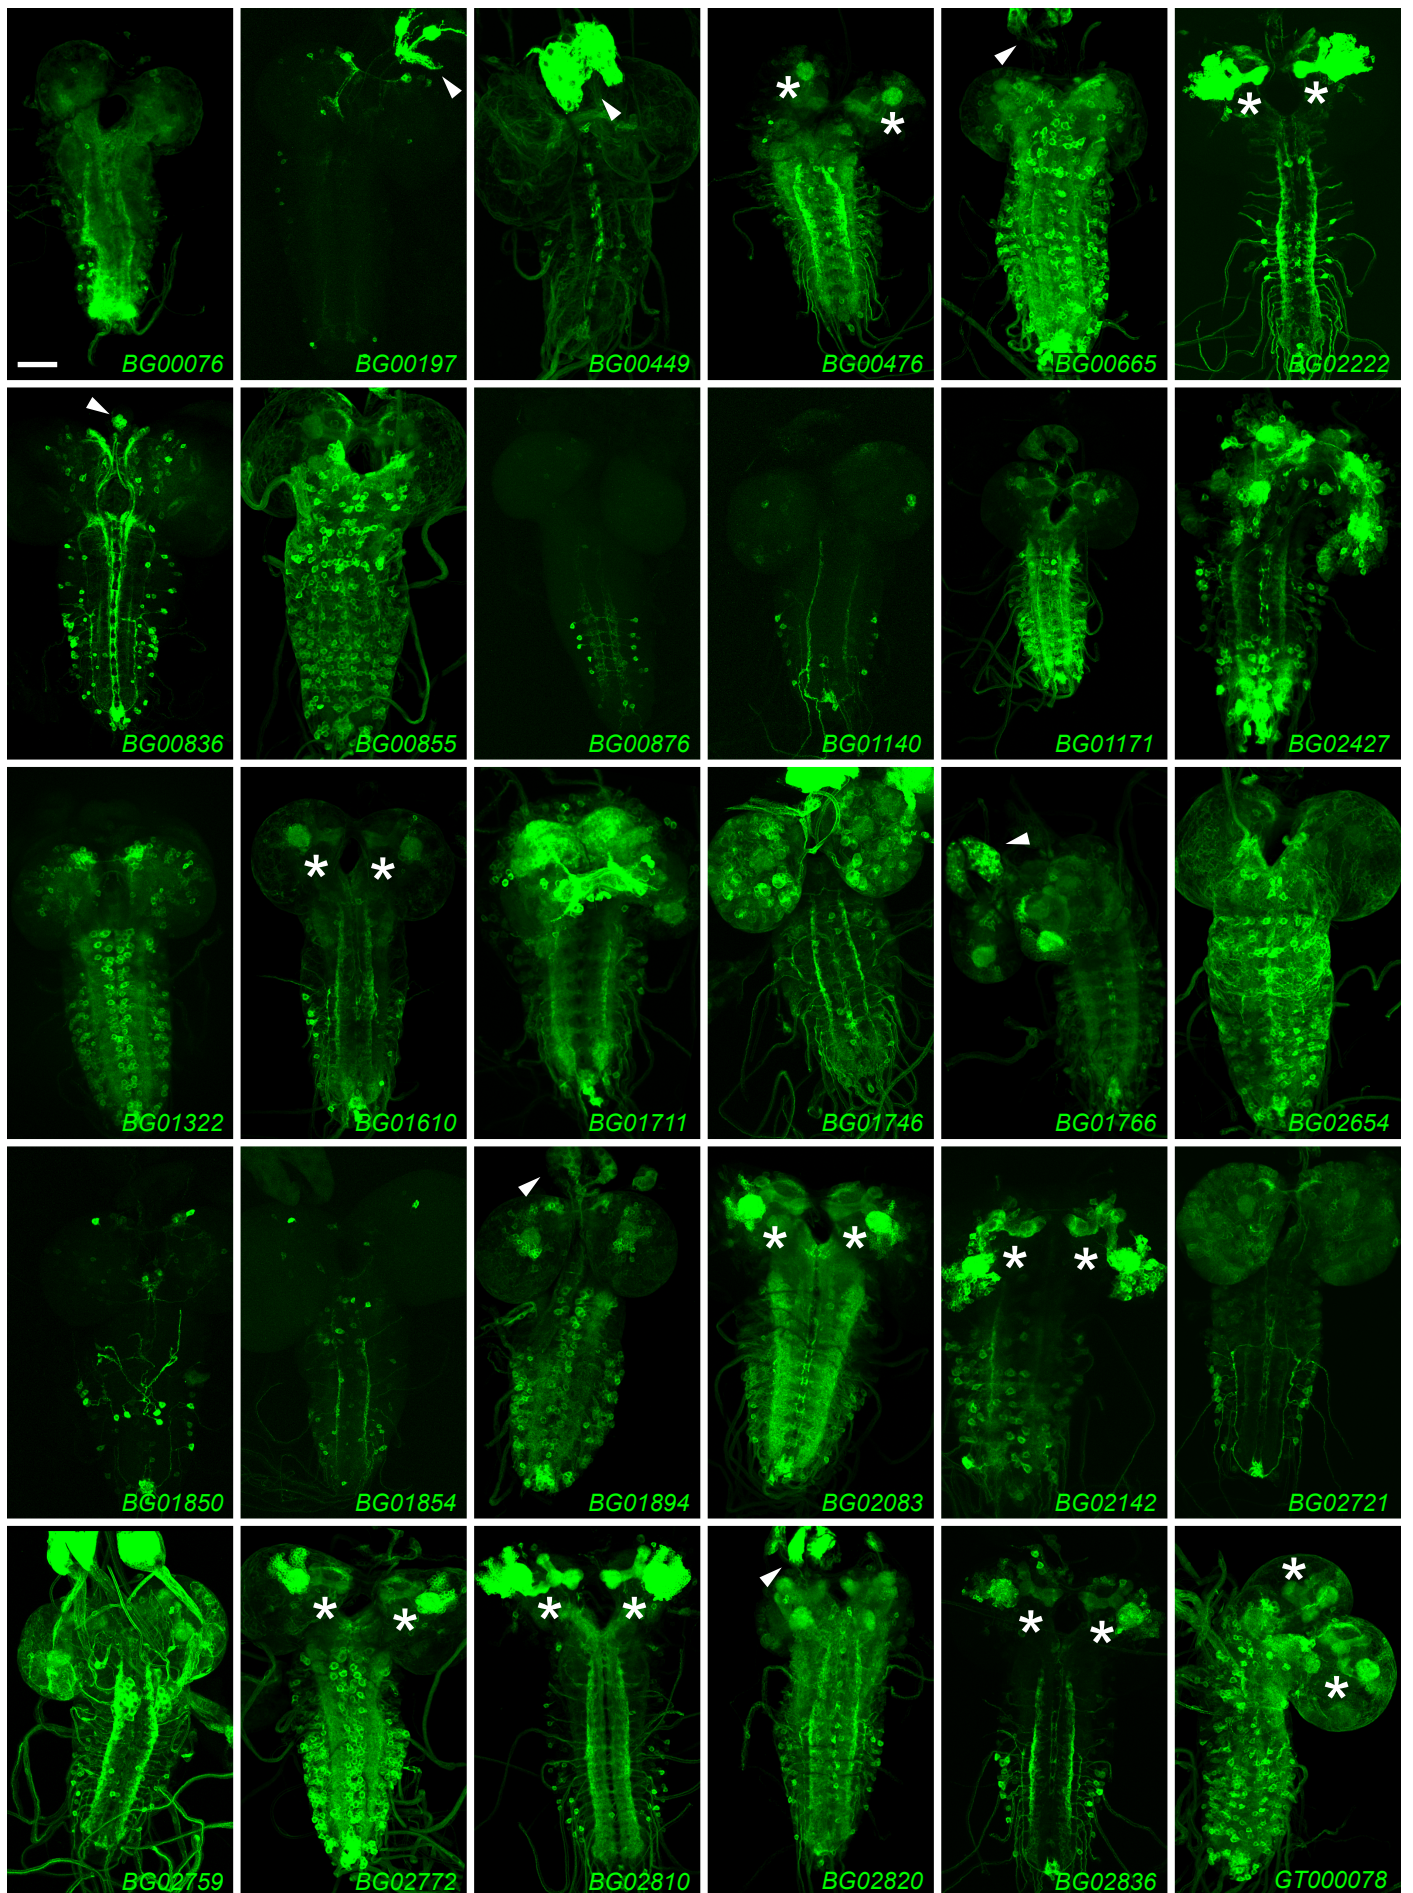

**Figure S1** Reporter gene expression patterns for 30 insertions with expression in neurons. Each line was crossed to *UAS-mCD8::GFP* prior to isolation of the CNS at the wandering 3rd instar larval stage, and representative confocal z-series projections of fixed tissues are shown. Arrowheads indicate expression in the ring gland, and asterisks denote expression in the mushroom bodies. Scale bar: 50 $\mu$ m.
