# Supplementary material
Source: PubMed Central journal article supplement (PMC4125399)
Supplement: 35183ea68a8f155499d6088c3099c973_genetics.114.166181-11.pdf [file 35183ea68a8f155499d6088c3099c973_genetics.114.166181-11.pdf]

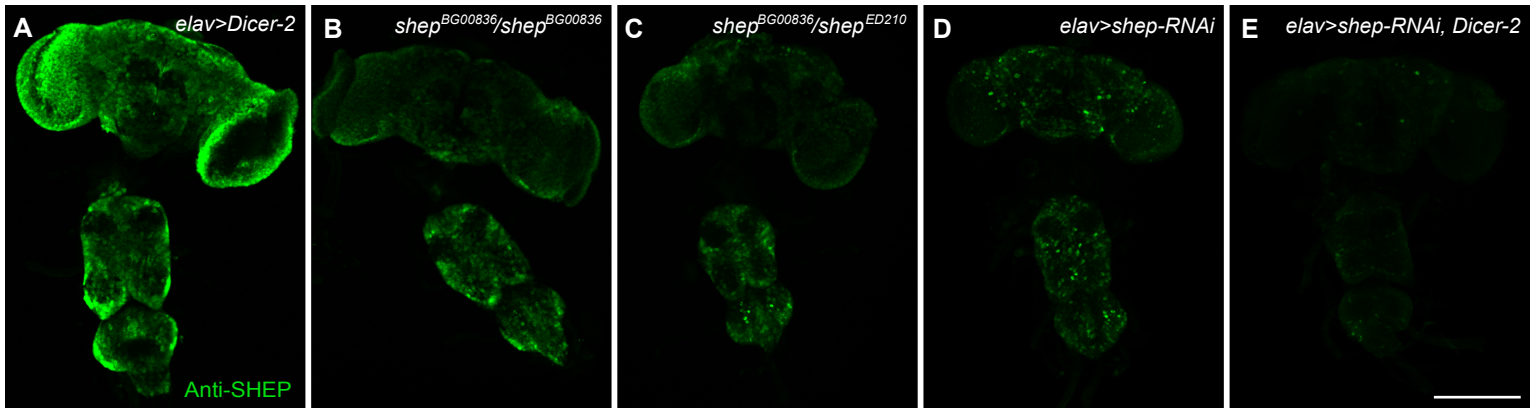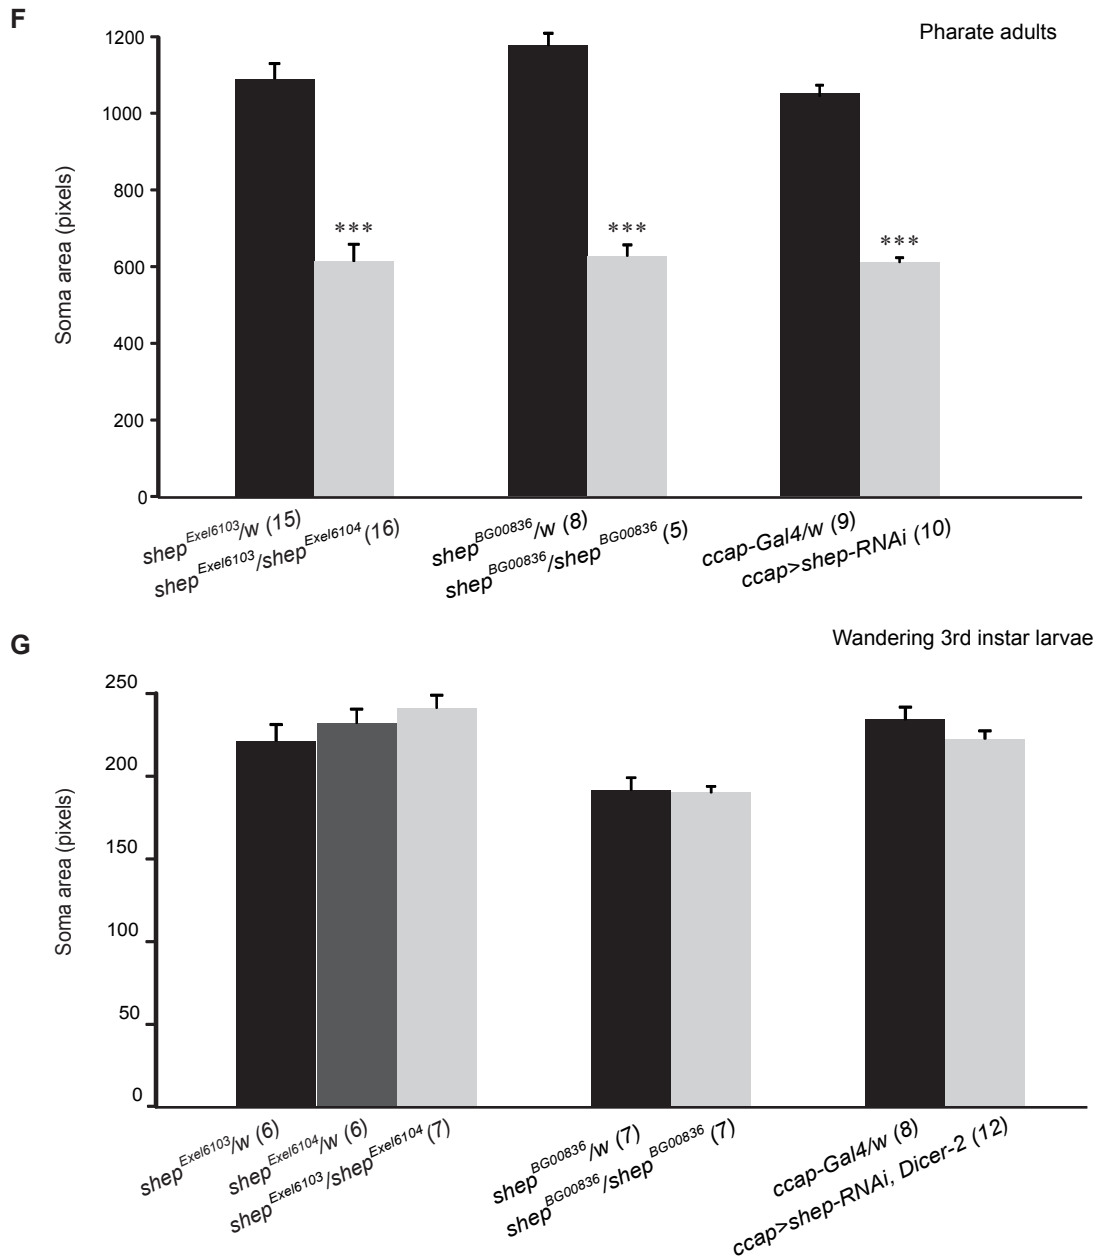

**Figure S10** Loss of SHEP resulted in smaller bursicon neurons in P14 stage pharate adults but not in wandering 3rd instar larvae. (A-E) Anti-SHEP immunostaining of *shep* loss-of-function mutants at the P14 pharate adult stage. Lower SHEP levels were observed in all of the *shep* mutant backgrounds, but *elav>shep-RNAi, Dicer-2* displayed the greatest reduction of SHEP levels in the CNS. (F) In P14 stage pharate adults, we observed reduced bursicon neuron soma areas in hypomorphic *shep* mutant backgrounds, which included *shep*<sup>Exel6103</sup>/*shep*<sup>Exel6104</sup>, *shep*<sup>BG00836</sup>/*shep*<sup>BG00836</sup> homozygotes, and *ccap>shep-RNAi*. (G) Bursicon neuron soma areas were unaffected in wandering 3rd larval instar *shep* mutants. The mutant backgrounds included *ccap>shep-RNAi, Dicer-2*, which was the strongest *shep* loss-of-function genotype, as judged by the impacts on branching in the peripheral axon arbor (Figure S11). The number of animals for each genotype is indicated in parentheses. \**P*<0.05, \*\**P*<0.01, \*\*\**P*<0.001, Student's *t*-test. Scale bar: 200 μm.
