# Supplementary material
Source: PubMed Central journal article supplement (PMC4125399)
Supplement: 99963a65fd53f3153ffad1fa652fe092_genetics.114.166181-3.pdf [file 99963a65fd53f3153ffad1fa652fe092_genetics.114.166181-3.pdf]

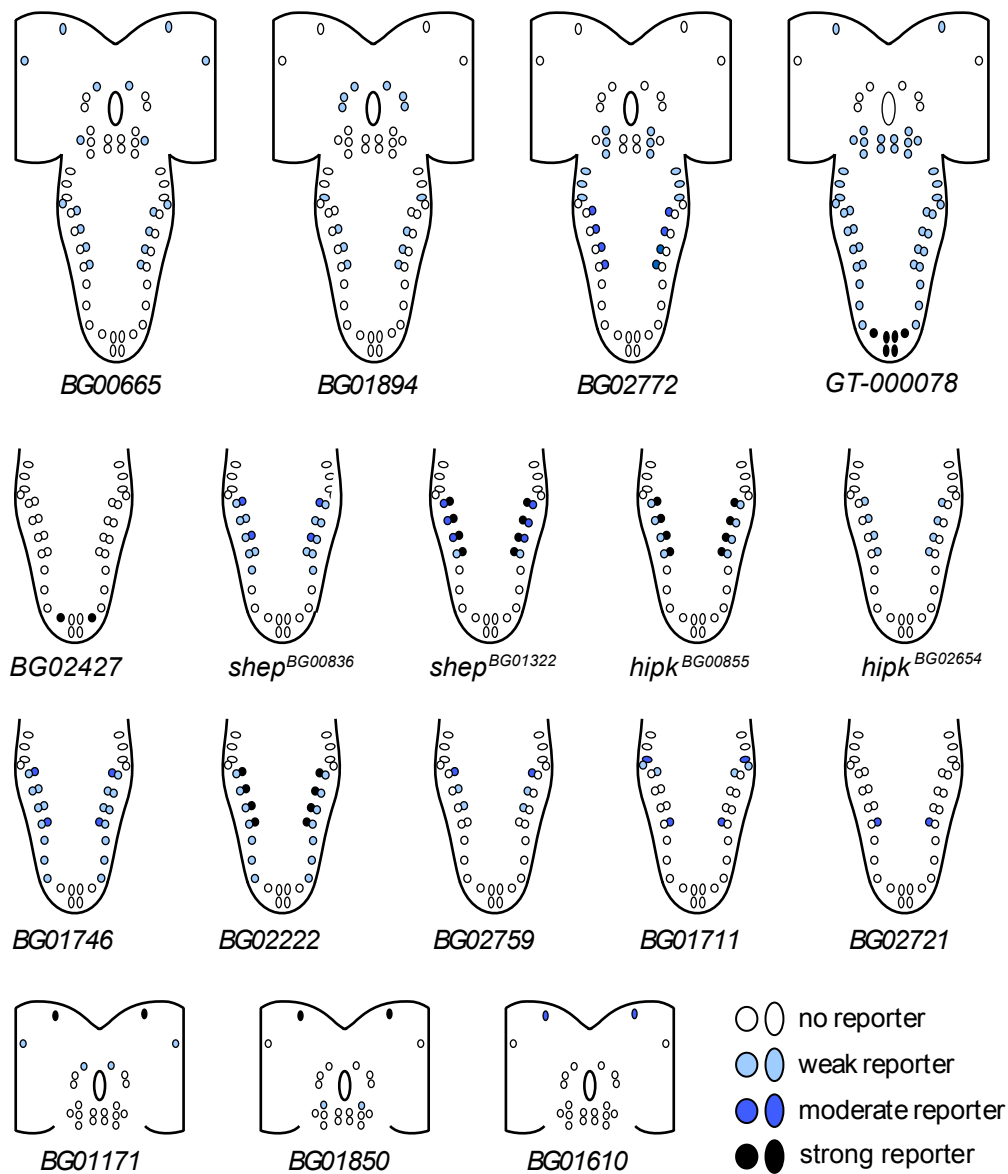

**Figure S2** Patterns of splice-trap reporter gene expression in CCAP neurons in the wandering 3rd instar larval CNS. We found 17 insertions that drove expression in CCAP neurons, which are indicated with circles on the schematic CNS diagrams. The relative intensities of GFP reporter expression (mCD8::GFP, subjective scale) are indicated with different colors, and CCAP neurons with no detectable expression of the reporter are indicated with open circles. If there was no reporter expression in the brain lobes or ventral nerve cord, those regions of the CNS are not shown.
