# Supplementary material
Source: PubMed Central journal article supplement (PMC4125399)
Supplement: f8a2d401bab3a7e10c201200208eefbb_genetics.114.166181-12.pdf [file f8a2d401bab3a7e10c201200208eefbb_genetics.114.166181-12.pdf]

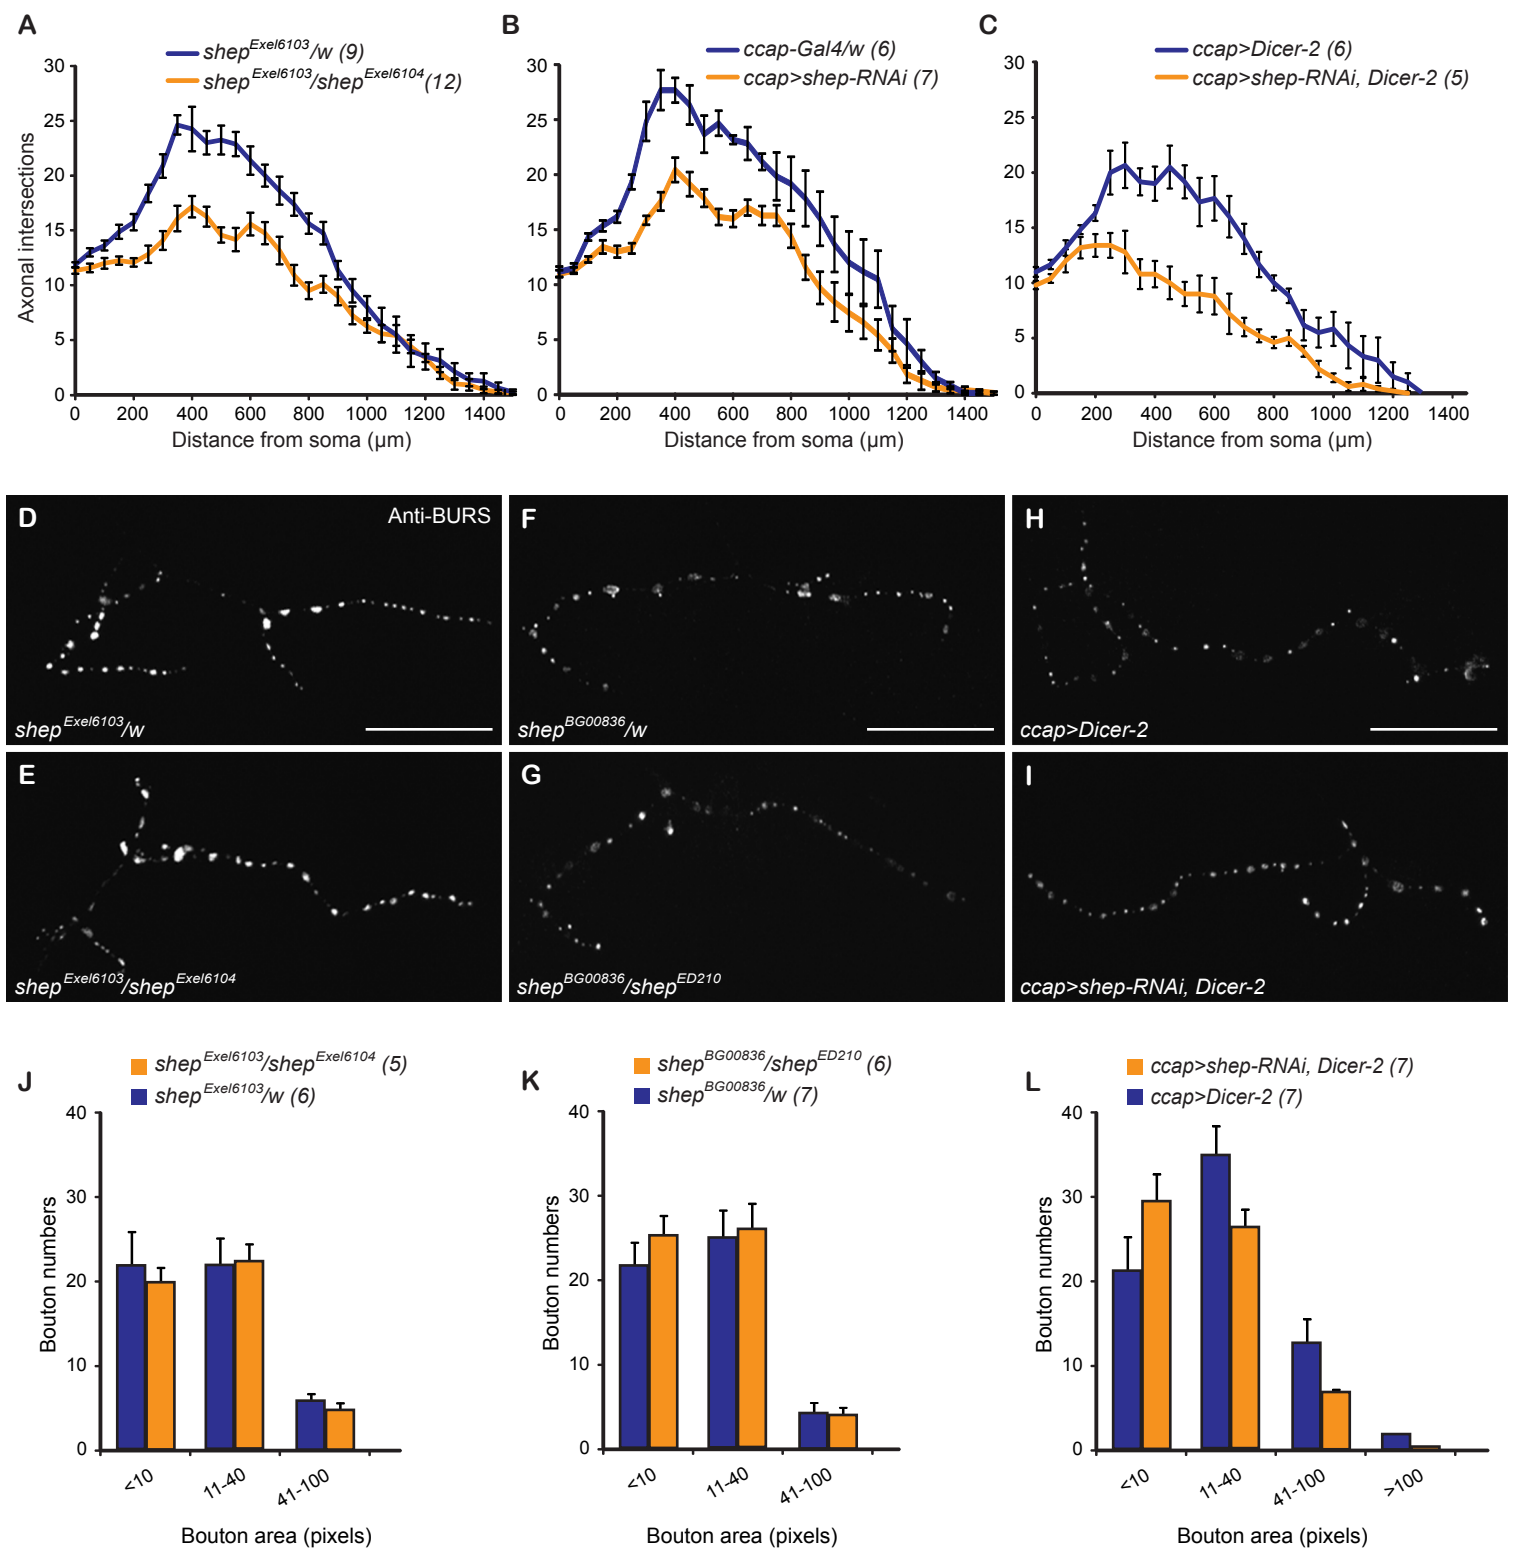

**Figure S12** *shep* promoted outgrowth of the peripheral projections of the bursicon neurons during metamorphosis. (A-C) Sholl analysis on the peripheral projections of P14 stage pharate adult bursicon neurons. For this analysis, we counted the number of axon intersections with nested, concentric rings, each with a 50 μm increase in radius from the next smallest ring. Sample sizes are listed in parentheses following each genotype. (D-I) In wandering 3rd instar larvae, the morphology of the neuromuscular junctions (NMJ) of the hypomorphic mutants *shep*<sup>Exel6103/shep</sup><sup>Exel6104</sup> (E), *shep*<sup>BG00836/shep</sup><sup>ED210</sup> (G), and *ccap>shep-RNAi, Dicer-2* (I) was similar to the morphology of the respective hemizygous controls (D, F, and H). (J-L) Binned counts of wandering 3rd instar larval NMJ boutons within size classes for *shep* loss-of-function animals. Sample sizes are listed in parentheses. Two-way ANOVAs,  $P=0.452479$  (panel J),  $P=0.597591$  (panel K), and  $P=0.271019$  (panel L). Scale bars: 100 μm.
